# Supplementary material for: RGS3L allows for an M2 muscarinic receptor-mediated RhoA-dependent inotropy in cardiomyocytes
Source: Springer Nature journal article supplement (doi:10.1007/s00395-022-00915-w), 2022-03-01
Supplement: MOESM1 [file 20180652]

**Figure S1**

**A**

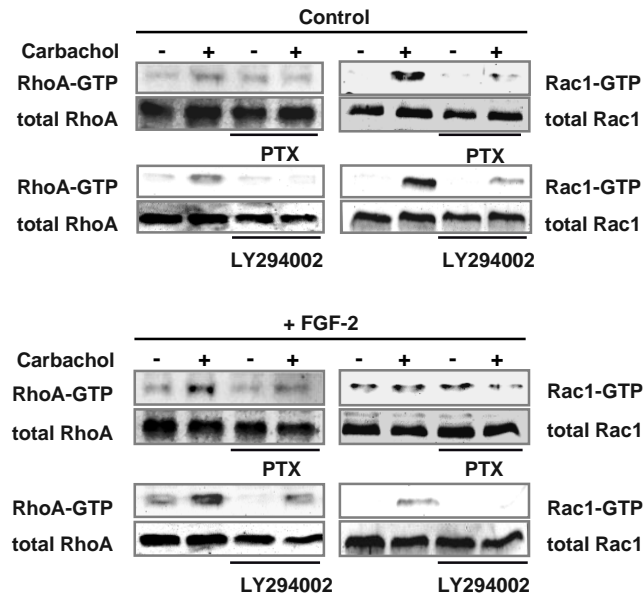

**B**

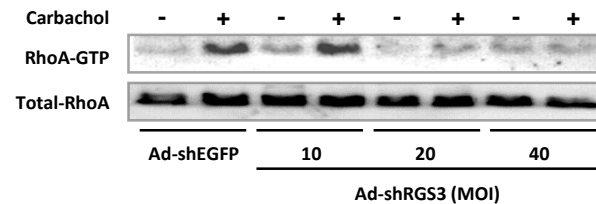

(A) Effect of PTX and LY294002 on the carbachol-induced Rac1 and RhoA activation in NRCM. To increase RGS3L expression, NRCM were incubated with 50 ng/ml FGF2 for 24 h if indicated. For inhibition of G<sub>i</sub>-protein and PI3K signaling, cells were treated with 100 ng/ml pertussis toxin (PTX) and 50 μM LY294002 for 2 h before stimulation with carbachol for 5 min, respectively. Levels of Rac1-GTP and RhoA-GTP were measured by Rac1 and RhoA activation assays. (B) NRCMs were transduced either with Ad5-shEGFP (MOI 40) or with increasing amounts of Ad5-shRGS3-shRNA for 72 h. After 5 min stimulation with or without carbachol, RhoA activation was measured. Like in M2R human embryonic kidney

**Figure S2**

**A**

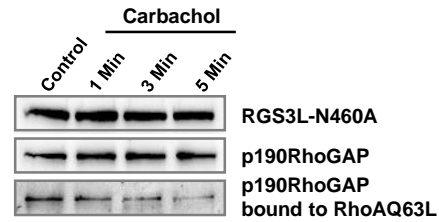

**B**

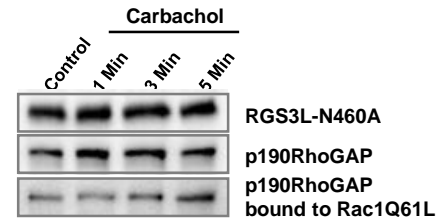

Time dependence of the change in RhoGAP (A) and RacGAP activity (B) of p190RhoGAP after carbachol stimulation in NRCM. Cells were transduced with Ad-RGS3L-N460A for 48h and then stimulated with carbachol for 1, 3 or 5 minutes. Relative RhoGAP and RacGAP activity of p190RhoGAP was determined by the amount of bound p190RhoGAP to RhoAQ63L and Rac1Q61L beads, respectively. The total amounts of p190RhoGAP and RGS3L-N460A in the cell lysates are shown as loading controls.
